# Supplementary material
Source: PubMed Central journal article supplement (PMC3531557)
Supplement: NIHMS426715-supplement-1_si_001.pdf [file NIHMS426715-supplement-1_si_001.pdf]

## Supporting Information

# Household Light Makes Global Heat: High Black Carbon Emissions From Kerosene Wick Lamps

*Nicholas L. Lam,<sup>1</sup> Yanju Chen,<sup>2</sup> Cheryl Weyant,<sup>2</sup> Chandra Venkataraman,<sup>3</sup> Pankaj Sadavarte,<sup>3</sup> Michael A. Johnson,<sup>4</sup> Kirk R. Smith,<sup>1</sup> Benjamin T. Brem,<sup>2</sup> Joseph Arineitwe,<sup>5</sup> Justin E. Ellis,<sup>2</sup> Tami C. Bond<sup>2\*</sup>*

1 Environmental Health Sciences, University of California, Berkeley, CA, 94720, USA.

2 Department of Civil and Environmental Engineering, University of Illinois at Urbana-Champaign, Urbana, IL, 61801, USA.

3 Department of Chemical Engineering and Climate Studies Program, Indian Institute of Technology Bombay, Powai, Mumbai 400076, India.

4 Berkeley Air Monitoring Group, Berkeley, CA, 94704, USA

5 Center for Integrated Research and Community Development (CIRCODU), Kampala, Uganda

\* Corresponding author: phone +1 (217) 244 5277, email: [yark@illinois.edu](mailto:yark@illinois.edu)

## **Supplemental Information Table of Contents**

### **S1. Material and Methods: Emission Testing**

#### **S1.1 Photographs of Lamps Tested Under Laboratory Conditions**

*Fig. S1a. Simple wick lamps*

*Fig. S1b. Hurricane wick lamp*

#### **S1.2 Emission Sampling System and Procedures**

##### **S1.2.1 Laboratory Measurement System**

*Fig. S2. Laboratory emission sampling system schematic*

##### **S1.2.2 Field Measurement System**

*Fig. S3. Field emission sampling system schematic*

#### **S1.3 Analytical Procedures**

##### **S1.3.1 Instrument Corrections: PSAP, Nephelometer**

##### **S1.3.2 Thermal Optical Transmittance Method: OC/EC Analysis**

*Fig. S4. Temperature profile for TOT method*

*Fig. S5. Thermogram of typical sampled filter from testing*

#### **S1.4 Data Processing**

##### **S1.4.1 Calculation of Emission Factors**

##### **S1.4.2 Calculation of SSA, MSC, and $MAC_{BC}$**

#### **S1.5 Fuel Analysis**

*Table S1. Kerosene fuel composition*

### **S2. Materials and Methods: Kerosene Consumption and BC Emission**

#### **S2.1 Kerosene Consumption**

*Table S2. Percent of houses using kerosene for lighting by country and region*

##### **S2.1.1 Estimating $f_{kero}$ From Household Electricity Access**

*Figure S6. Kerosene lighting vs. electricity access*

##### **S2.1.2 Lighting in South Asia (Excluding India)**

##### **S2.1.3 Lighting in African regions**

#### **S2.2 Kerosene Consumption in India**

#### **S2.3 Outdoor Escape Fraction ( $f_{outdoor}$ )**

### **S3. Additional Results**

#### **S3.1 Real-Time Pollutant Concentrations**

*Fig. S7a. Real-time particle scattering and absorption*

*Fig. S7b. Real-time  $CO_2$*

*Fig. S7c. Real-time  $CO$*

#### **S3.2 Emission Factors and Aerosol Characteristics**

*Table S3. Lab and field emission factors (disaggregated)*

*Table S4. Lab and field emission ratios (disaggregated)*

*Fig. S8a.  $PM_{2.5}$ , BC and OC emission factors from simple wick lamps*

*Fig. S8b.  $CO$  emission factors from simple wick lamps*

*Fig. S8c. Burn rates from simple wick lamps*

#### **S3.3 Impact Estimates**

##### **S3.3.1 Global BC Emission**

*Figure S9. MC frequency distribution of global BC emission*

*Table S5. Assumptions and BC emission for 17 global regions*

### S3.3.2 Radiative Forcing

*Table S6a. Specific forcing pulse from 17 emitting regions: direct*

*Table S6b. Specific forcing pulse from 17 emitting regions: snow deposition*

## S1. Materials and Methods: Emission Testing

### *S1.1 Photographs of Lamps Tested Under Laboratory Conditions*

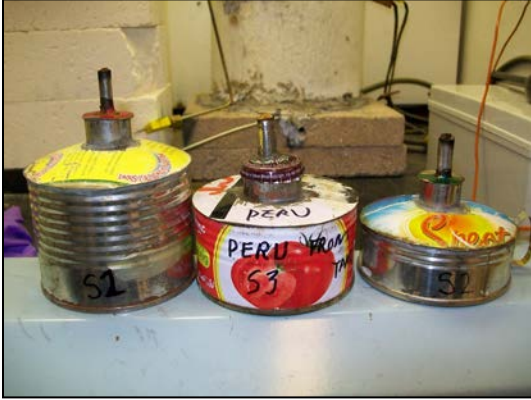

**Fig. S1a.** Simple wick lamps

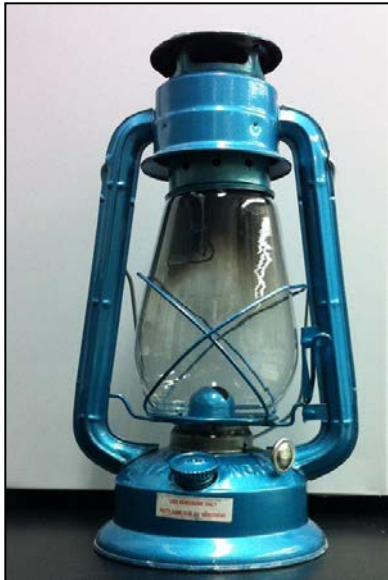

**Fig. S1b.** Hurricane wick lamp

### *S1.2 Emission Sampling System and Procedures*

#### *S1.2.1 Laboratory Measurement System*

Figure S2 provides an overview of the sampling system used to measure emissions from lamps. A multipoint dilution sampling probe<sup>1</sup> was used to extract the lamp emissions at a flow rate of 5 LPM. The probe sets include a 1.5 ft probe, four 6 in and four 2 in probes with decreasing hole size closer to the center. Dry, particle-free air was

used as the diluent at a ratio of 2-3:1. After, the dilution CO<sub>2</sub> and CO concentrations were measured in real-time with a Li-COR 6252 (Li-COR Biosciences, Lincoln, NE) and Horiba AIA-220 (Horiba, Kyoto, Japan) non-dispersive infrared (NDIR) analyzers, respectively. Gas analyzers were calibrated with standard span gas (S.J. Smith Co., Decatur, IL) under sampling conditions. A second dilution step with dry particle-free air at a dilution ratio of 3:1 was required to prevent the overloading of the scattering coefficient signal of the integrating nephelometer (M903, Radiance Research, Shoreline, WA) operating at a wavelength of 530 nm. This instrument was calibrated before and after the experiment with dry particle free air (ZERO) and Coleman-grade CO<sub>2</sub> (SPAN). Parallel to the nephelometer a particle soot absorption photometer (PSAP, Radiance Research, Shoreline, WA) was operated at a flow rate of 0.2 LPM to measure the absorption coefficient at three wavelengths of 467, 530 and 660 nm. Flow rates through filter holders varied from 0.2-0.6 L/min. Laboratory tests were conducted at the University of Illinois at Urbana-Champaign.

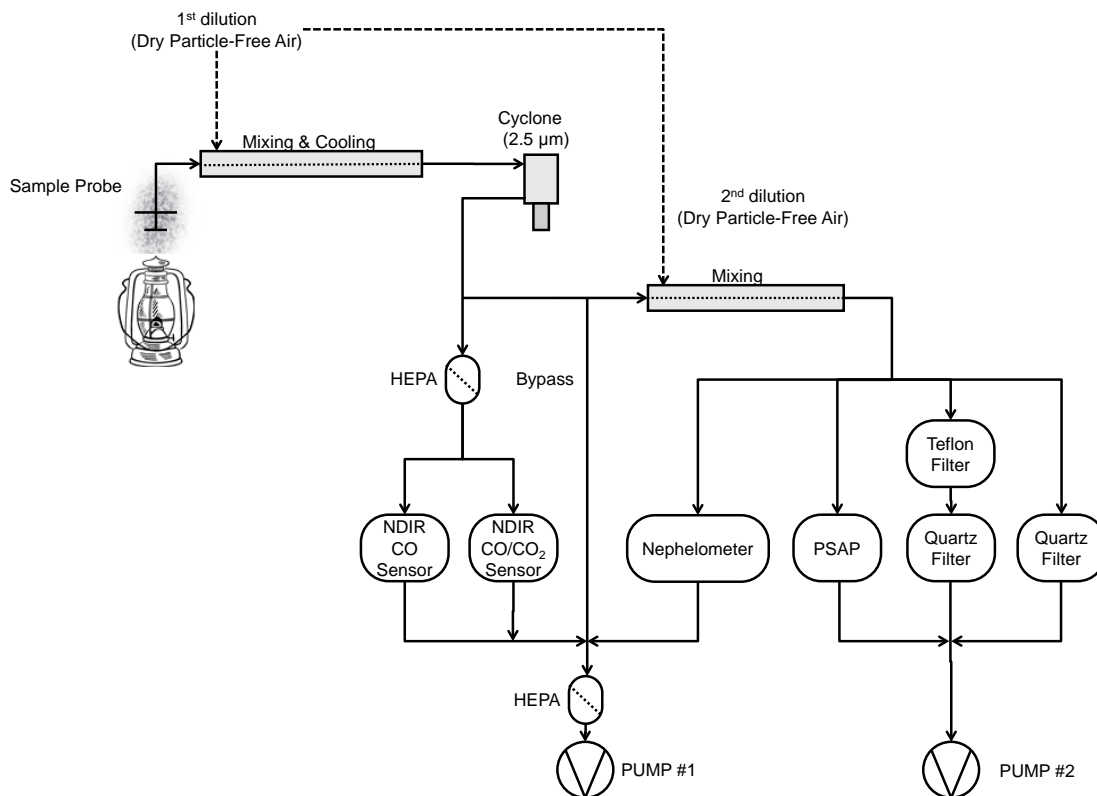

**Fig. S2.** Laboratory emission sampling system schematic

### ***S1.2.2 Field Measurement System***

Figure S3 is a schematic of the sampling system used to measure emissions from lamps under field conditions. Samples were taken on an outdoor patio with lamps placed on the ground. A multipoint sampling probe was used to extract emissions at a flow rate of ~2 L/min. Real-time data were recorded every second.

CO and CO<sub>2</sub> sensors were calibrated with zero and span gases. The raw scattering signal from the PM sensor was calibrated with an integrating nephelometer (3563, TSI Inc., Shoreview, MN) to provide a particle scattering coefficient at red wavelength (660 nm). All calibrations were performed in the laboratory before the field campaign. Ambient temperature, pressure and relative humidity were recorded for each test, and were used to correct measured concentrations to standard conditions.

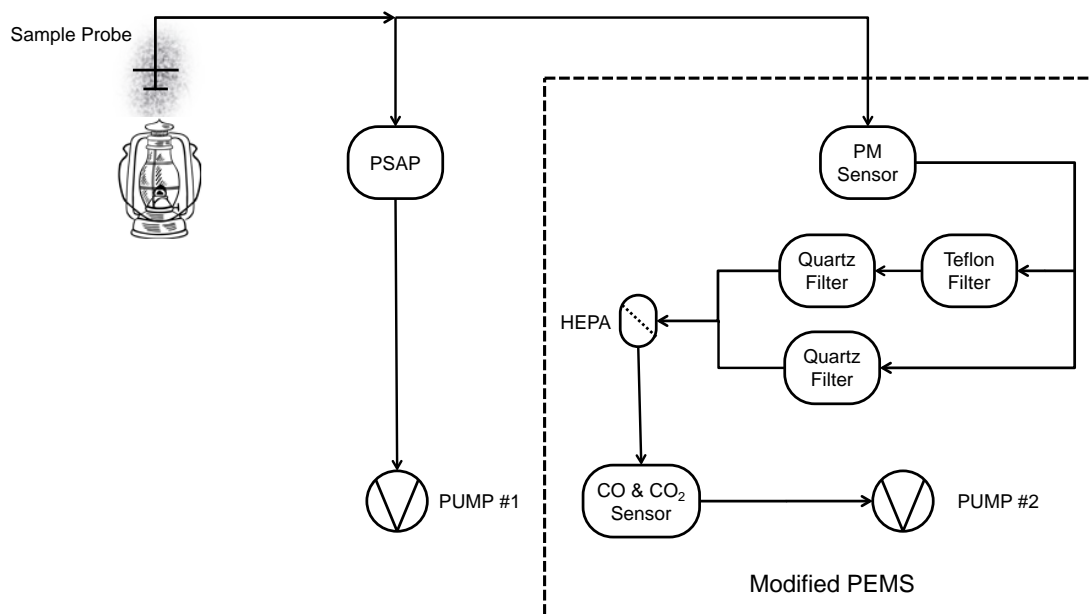

**Fig. S3.** Field emission sampling system schematic

### ***S1.3 Analytical Procedures***

#### ***S1.3.1 Instrument Corrections: PSAP, Nephelometer***

We performed further corrections of the absorption coefficient ( $b_{ap}$ ) due to flow rate, filter size (spot size), particle scattering effect and instrument precision as suggested by Bond et al.<sup>2</sup> The truncation correction of the nephelometer was set to be 4% according to

Anderson and Ogren.<sup>3</sup> All the measured results were corrected to standard conditions (1 atm and 20 °C).

### *S1.3.2 Thermal Optical Transmittance Method: OC/EC Analysis*

In the NIOSH TOT method,<sup>4</sup> OC and carbonate carbon in the sample are first volatilized in a pure helium atmosphere as the temperature is stepped to 890°C. The temperature is then reduced and oxygen-helium carrier gas is introduced. The temperature is then raised to 860°C in steps, when elemental carbon (here used as equivalent to black carbon) is evolved. Temperature profiles are shown in Fig. S4 and Fig. S5. All carbon evolving from the filter is reduced to methane, and measured with a flame ionization detector. Figure S5 shows a typical thermogram to which has been added the differentiation of the laser transmission curve, divided by an assumed absorption cross-section.<sup>5</sup> That curve approximately represents the formation (negative values) or loss (positive values) of charred OC. Formation and loss of char at all points in the analysis are small relative to BC.

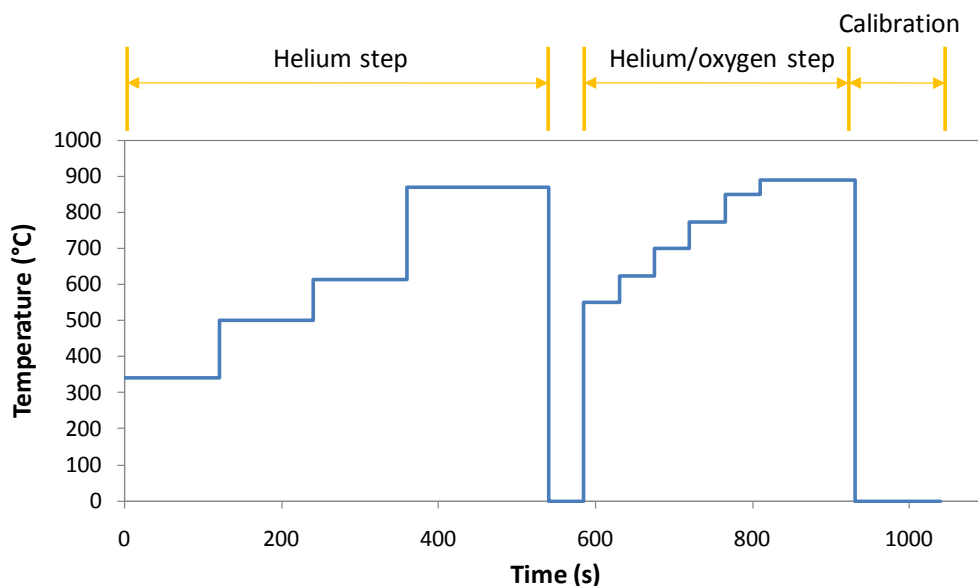

**Fig. S4.** Temperature profile of NIOSH TOT method on the Sunset OC/EC analyzer

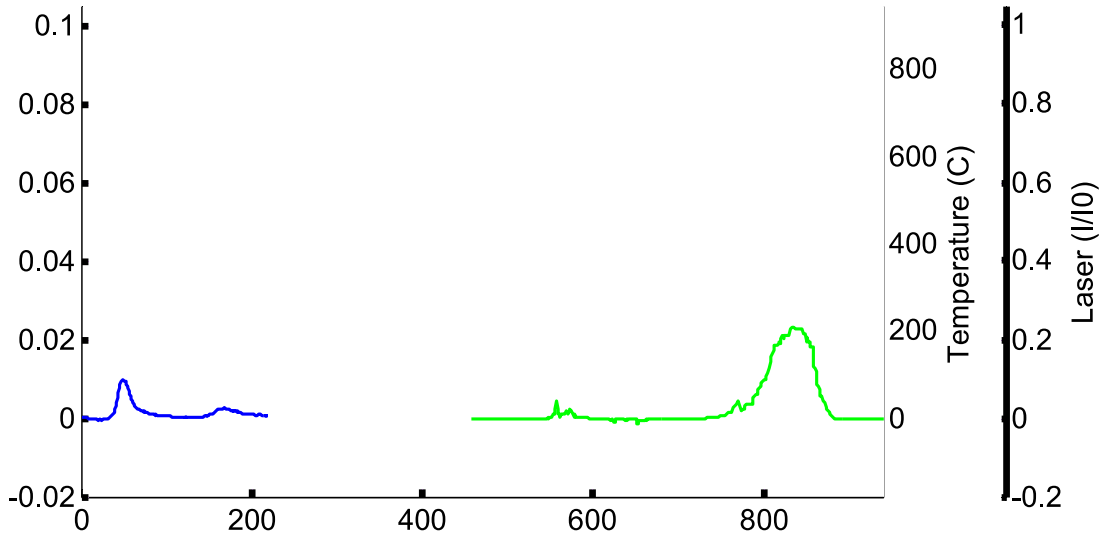

**Fig. S5.** Thermogram of a typical sampled filter from laboratory tests of kerosene lamps

## ***S1.4 Data Processing***

### ***S1.4.1 Calculation of Emission Factors***

Before calculating emission properties, real-time measured concentrations (CO, CO<sub>2</sub>, particle absorption and scattering coefficient) were converted to standard conditions (1 atm and 20 °C). Background CO and CO<sub>2</sub> concentrations and scattering, absorption, were subtracted.

Emission factors for PM, OC and EC (EF<sub>PM</sub>, EF<sub>OC</sub> or EF<sub>EC</sub>) are expressed in units of g PM (OC or EC)/kg kerosene burnt and determined with the following equation with EF<sub>PM</sub> as an example.

$$EF_{PM}(g/kg \text{ kerosene}) = \frac{C_{PM}(g/m^3 \text{ air})}{Fuel (kg/m^3 \text{ air})} = \frac{M_{PM}/(Q_{PM} \cdot T)(g/m^3 \text{ air})}{Fuel (kg/m^3 \text{ air})}$$

Where,  $M_{PM}$  is the mass of PM on the filter as determined by the methods described previously,  $Q_{PM}$  is the flow rate through the filter, and  $T$  is the length of the sampling period. Emission factors of CO and CO<sub>2</sub> were determined in a similar way but used the test averaged CO or CO<sub>2</sub> concentration instead of  $C_{PM}$ .  $Fuel$  has the unit of kg kerosene



consumed per cubic meter of air sampled ( $\text{kg}/\text{m}^3$ ) and determined using the “carbon balance method”, which uses the total gaseous and particulate carbon ( $\text{CO} + \text{CO}_2 + \text{EC} + \text{OC}$ ) emissions as a proxy for total fuel burnt. Carbon content of kerosene is approximately 85%.<sup>6</sup> *Fuel* is calculated with the following equation:

$$\text{Fuel } (\text{kg}/\text{m}^3 \text{ air}) = \text{gas}_{\text{carb}} \frac{\text{m}^3}{\text{m}^3 \text{ air}} \cdot \left( 0.499 \frac{\text{kgC}}{\text{m}^3 \text{ gas}_{\text{carb}}} \right) / 0.85 \frac{\text{kgC}}{\text{kg kerosene}}$$

#### ***SI.4.2 Calculation of SSA, MSC and MAC<sub>BC</sub>***

Data obtained from real-time measurements, sometimes combined with filter results, can be used to calculate test-averaged properties such as single scattering albedo (SSA), mass scattering cross section (MSC) and mass absorption cross section ( $\text{MAC}_{\text{BC}}$ ).

$$\text{SSA}_{\text{lab}} = \frac{b_{\text{sp,avg}}}{b_{\text{sp,avg}} + b_{\text{ap530,avg}}}$$

$$\text{SSA}_{\text{field}} = \frac{b_{\text{sp,avg}}}{b_{\text{sp,avg}} + b_{\text{ap660,avg}}}$$

$$\text{MSC} = \frac{b_{\text{sp,avg}}}{C_{\text{PM}}}$$

$$\text{MAC}_{\text{BC}} = \frac{b_{\text{ap530,avg}}}{C_{\text{BC}}}$$

Where  $b_{\text{sp,avg}}$  is the test-averaged scattering coefficient (530nm for the laboratory tests and 660nm for field tests,  $\text{Mm}^{-1}$ ),  $b_{\text{ap530,avg}}$  is the : test-averaged absorption coefficient (530nm,  $\text{Mm}^{-1}$ ),  $b_{\text{ap660,avg}}$  is the test-averaged absorption coefficient (660nm,  $\text{Mm}^{-1}$ ),  $C_{\text{PM}}$  is the filter-integrated PM concentration for a test ( $\text{g}/\text{m}^3$ ), and  $C_{\text{BC}}$  is the filter-integrated BC concentration for a test ( $\text{g}/\text{m}^3$ ).

#### ***SI.5 Fuel Analysis***

Testing of kerosene fuel composition was performed on kerosene purchased and produced in the USA and Uganda by Intertek Labs (Chicago, Illinois, USA). Tested samples were taken from the same fuel stocks burned in lamps tested in the lab. Ugandan

kerosene had approximately twice the sulfur content and six times the particulate contamination (Table S1). Aromatic content was also slightly higher as were some trace elements, including calcium, silicon, sodium, and zinc.

**Table S1.** Kerosene fuel composition

| <b>ASTM Method</b> |                                  | <b>Uganda</b> | <b>USA</b> | <b>Units</b> |
|--------------------|----------------------------------|---------------|------------|--------------|
| <i>ASTM D4294</i>  | <b>Sulfur Content</b>            | 0.082         | 0.015      | Wt %         |
| <i>ASTM D1319</i>  | <b>Aromatics</b>                 | 18.8          | 16.1       | Vol %        |
| <i>ASTM D482</i>   | <b>Ash</b>                       | <0.001        | 0.002      | Wt %         |
| <i>ASTM D7111</i>  | <b>Trace Elements</b>            |               |            |              |
|                    | <i>Calcium</i>                   | 0.12          | < 0.10     | mg/kg        |
|                    | <i>Silicon</i>                   | 1.40          | 0.1        | mg/kg        |
|                    | <i>Sodium</i>                    | 0.50          | 0.41       | mg/kg        |
|                    | <i>Zinc</i>                      | 2.00          | < 0.10     | mg/kg        |
| <i>ASTM D5452</i>  | <b>Particulate Contamination</b> | 6.80          | 1.11       | mg/L         |

## S2. Materials and Methods: Kerosene Consumption and BC Emissions

### S2.1 Kerosene Consumption

For each country-level bottom-up estimate of kerosene consumption for lighting,  $KERO_{est}$ , five factors were multiplied:

$$KERO_{est} = N_{house} \times f_{kero} \times N_{lamp} \times t \times BR \times 365$$

1.  $N_{house}$  - Number of households in the country
2.  $f_{kero}$  - Fraction of households reported or estimated to rely on kerosene for lighting.
3.  $N_{lamp}$  - Number of lamps in each household
4.  $t$  - Duration of time the lamp is used per day
5.  $BR$  – Fuel burn rate of each device

The product of the five factors was multiplied by 365 days to arrive at an annual kerosene consumption rate. These bottom-up values were then divided by the country specific residential kerosene consumption reported by IEA, as described in the Methods of the text, to arrive at an estimate of the fraction of residential kerosene used for lighting ( $f_{light}$ ).

Censuses or national household surveys provided the number of households (Factor 1). Factors 2-4 were taken from previous publications, nationally representative surveys performed by statistics bureaus, international survey institutions (e.g. DHS), and publicly available lighting market research. In some cases, the fraction of households relying on kerosene for lighting (Factor 2) was estimated using data on household access to electricity (S2.1.1), which is more commonly measured as part of household surveys. Table S2 shows the list of countries used to derive regional estimates. In total, this list comprises the majority of the population in regions assumed to have non-zero lighting consumption: Central America (78%), South America (72%), African regions (73%), South Asia (72%), and Southeast Asia (71%). The kerosene lighting fraction was assumed to be zero for several regions considered most developed, including the USA, Canada, Japan, and the former USSR. The same was assumed for East Asia, with the

exception of China where a previous analysis of rural energy consumption found that residential oil, including kerosene, is used primarily for lighting in areas without access to grid-based electricity.<sup>7</sup> One survey containing lighting information was found for the Middle East so we instead estimated the fraction of kerosene lighting for the region using the data on household access to electricity in 2009, reported by IEA in 2011.<sup>8</sup>

The number of lamps (Factor 3) was estimated at 2 per house and a triangular distribution bounded at (1, 3), with the exception of Africa where several detailed surveys were available (S2.1.3). Use was estimated at 3 hours per day with a triangular distribution bounded at (2, 4). The selection of a fuel burn rate (Factor 5) was guided by measurements reported in this study, with a central value of 0.12 g/min and 90% uncertainty bounds (0.05, 0.20) and a normal distribution. We apply the burn rate from simple wick lamps to all kerosene lighting devices, including hurricane lamps, so our estimate of kerosene consumption for lighting is likely conservative as simple wick lamps have the lowest burn rate of the lighting devices commonly used in households.<sup>9</sup> However, in estimating the fraction of kerosene burned in simple wick lamps, we also do not consider differences in burn rates. Thus, our final estimate of consumption in simple wick lamps is unbiased by the neglect of higher consumption rates in other lighting devices represented primarily by hurricane lamps.

**Table S2. Percent of households using kerosene for lighting by country and region**

| Region          | Country      | Year | % Households                       |                                           |
|-----------------|--------------|------|------------------------------------|-------------------------------------------|
|                 |              |      | Using Kerosene as Primary Lighting | Source                                    |
| Eastern Africa  | Ethiopia     | 2008 | 74%                                | Lighting Africa <sup>10</sup>             |
| Eastern Africa  | Kenya        | 2008 | 87%                                | Lighting Africa <sup>11</sup>             |
| Eastern Africa  | Madagascar*  | 2008 | 73%                                | DHS <sup>12</sup>                         |
| Eastern Africa  | Rwanda       | 2002 | 68%                                | IPUMS <sup>13</sup>                       |
| Eastern Africa  | Sudan        | 2008 | 40%                                | Ismail and Khlafala (2009) <sup>14</sup>  |
| Eastern Africa  | Uganda       | 2009 | 80%                                | Uganda Bureau of Statistics <sup>15</sup> |
| Eastern Africa  | Zambia       | 2008 | 13%                                | Lighting Africa <sup>16</sup>             |
| Northern Africa | Egypt*       | 2008 | 36%                                | DHS <sup>12</sup>                         |
| Northern Africa | Morocco*     | 2008 | 20%                                | DHS <sup>12</sup>                         |
| Southern Africa | Angola*      | 2007 | 55%                                | DHS <sup>12</sup>                         |
| Southern Africa | South Africa | 2010 | 3%                                 | Statistics South Africa <sup>17</sup>     |
| Southern Africa | Swaziland*   | 2009 | 50%                                | CSO Swaziland <sup>18</sup>               |
| Southern Africa | Tanzania     | 2008 | 67%                                | Lighting Africa <sup>19</sup>             |
| Western Africa  | Cameroon*    | 2004 | 47%                                | DHS <sup>12</sup>                         |
| Western Africa  | Congo*       | 2008 | 75%                                | DHS <sup>12</sup>                         |
| Western Africa  | Ghana        | 2007 | 66%                                | Lighting Africa <sup>20</sup>             |
| Western Africa  | Nigeria      | 2006 | 75%                                | NBS Nigeria <sup>21</sup>                 |
| Western Africa  | Senegal      | 2002 | 19%                                | IPUMS <sup>13</sup>                       |
| Western Africa  | Sierra Leone | 2003 | 79%                                | SLIHS <sup>22</sup>                       |
| Central America | El Salvador  | 2007 | 6%                                 | DIGESTYC <sup>23</sup>                    |
| Central America | Guatemala    | 2000 | 21%                                | IPUMS <sup>13</sup>                       |
| Central America | Honduras     | 2010 | 9%                                 | INE Honduras <sup>24</sup>                |
| Central America | Nicaragua    | 2005 | 21%                                | INIDE Nicaragua <sup>25</sup>             |
| Central America | Panama       | 2010 | 8%                                 | INE Panama <sup>26</sup>                  |
| Middle East     | Jordan       | 2004 | 1%                                 | IPUMS <sup>13</sup>                       |
| South America   | Bolivia*     | 2008 | 18%                                | DHS <sup>12</sup>                         |
| South America   | Brazil*      | 2009 | 2%                                 | ECLAC <sup>27</sup>                       |
| South America   | Colombia*    | 2005 | 3%                                 | DANE <sup>28</sup>                        |
| South America   | Jamaica      | 2001 | 9%                                 | IPUMS <sup>13</sup>                       |
| South America   | Peru*        | 2010 | 11%                                | INEI Peru <sup>29</sup>                   |
| South Asia      | Bangladesh   | 2004 | 56%                                | BIDS/ESMAP <sup>30</sup>                  |
| South Asia      | India        | 2007 | 34%                                | NSSO <sup>31, 32</sup>                    |
| South Asia      | Nepal        | 2001 | 53%                                | IPUMS <sup>13</sup>                       |
| South East Asia | Cambodia     | 2008 | 38%                                | IPUMS <sup>13</sup>                       |
| South East Asia | Indonesia    | 2007 | 5%                                 | Statistik Indonesia <sup>33</sup>         |
| South East Asia | Philippines  | 2000 | 27%                                | IPUMS <sup>13</sup>                       |
| South East Asia | Vietnam      | 2009 | 4%                                 | IPUMS <sup>13</sup>                       |

\* Estimated from data on household access to electricity (S2.1.1),  $f_{kero} = 0.87 * f_{no-electricity} + 0.01$

### ***S2.1.1 Estimating $f_{kero}$ From Household Electricity Access***

The percent of households using kerosene for lighting is not collected as part of all household surveys or censuses and was estimated for several countries using the fraction of houses without electricity. Figure S6 shows a regression of the percent of households reporting kerosene as a primary lighting fuel ( $f_{kero}$ ) and the percent of households without access to electricity ( $f_{no-elec}$ ) for 24 countries for which data were available. Information on electricity access prevalence was obtained primarily from Demographic and Health Surveys<sup>12</sup> to minimize uncertainty due to differences in the definition of electricity access. The resulting relationship between kerosene lighting and household access to electricity is approximately linear ( $f_{kero} = 0.78 * f_{no-electricity} + 0.03$ ) with a strong correlation ( $R^2 = 0.65$ ) that increases substantially, while altering the linear estimates very little, when one outlier (Zambia) is excluded ( $f_{kero} = 0.87 * f_{no-electricity} + 0.01$ ,  $R^2 = 0.79$ ; applied in Table S2). Zambia is unique among other countries represented in the dataset, as the majority of households are without electricity (82%), however lighting is performed almost entirely with candles.<sup>16</sup> Overall, these results provide supporting evidence that kerosene is still the primary source of household lighting fuel in areas without access to electricity.

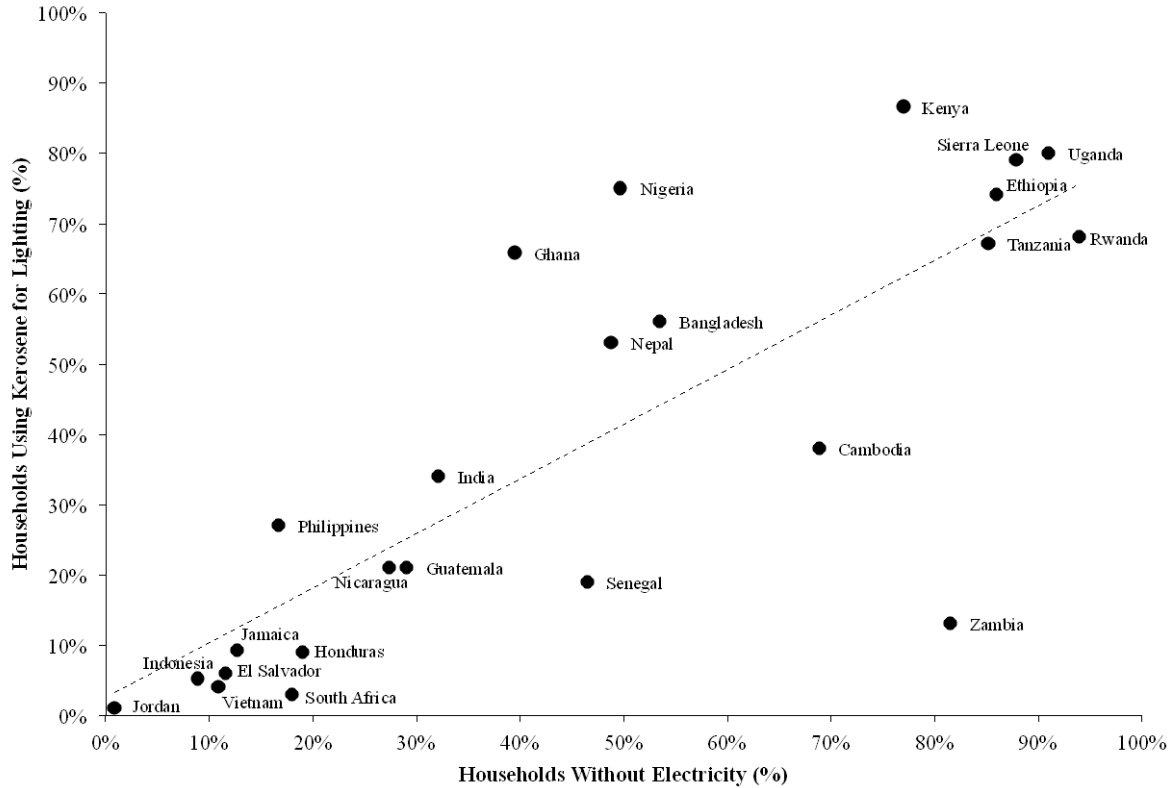

**Fig. S6.** Percent of households reporting kerosene as a primary source of lighting ( $f_{kero}$ ) versus the percent of households without access to electricity ( $f_{no-elec}$ ) ( $N = 24$ ). The dashed line represents the best-fit line using all available data (All Data,  $R^2 = 0.65$ ; without Zambia,  $R^2 = 0.79$ )

### S2.1.2 Lighting in South Asia (Excluding India)

Kerosene lighting is prevalent in several South Asian countries outside of India. Household lighting information for Bangladesh (~5% South Asian population) was available from rural energy surveys collected by the Bangladesh Institute of Development Studies in 2004, and summarized recently by the Energy Management Assistance Program.<sup>30</sup> These surveys indicate that approximately 71% of rural households rely on kerosene devices (simple wick or hurricane) as primary lighting sources (average 1.8 simple wicks, and 0.89 hurricanes per house). Assuming the urban sector has minimal usage of kerosene for lighting and considering the urban/rural population fraction provided in the same report (~80% rural), 71% of rural households corresponds to approximately 56% of all households. Results from the 2001 census in Nepal indicate that 53% of households relied on kerosene fuel as a primary lighting source,<sup>13</sup> however this number may be slightly lower now, given the age of the dataset.

### S2.1.3 Lighting in African Regions

National household survey data confirm anecdotal accounts of kerosene fuel being a primary and dominant source of lighting fuel in African households. In East Africa several in-depth and nationally representative evaluations of household lighting by Lighting Africa, and statistics bureaus (e.g. Uganda and Rwanda) have been performed. Several sources provide data on the number of lighting devices used per house, estimated hours of daily usage, and the prevalence of lighting devices (e.g. simple wick, hurricane, electric bulb, candles etc.). Based on these sources we use a central estimate of 1.3 simple wick lamps per household. Usage hours and burn rate were the same as those used for all other regions and described previously. We used data from the following countries in this analysis:

| Region          | Countries                                                                                         |
|-----------------|---------------------------------------------------------------------------------------------------|
| Eastern Africa  | Ethiopia 2007/2008 <sup>10</sup> , Kenya 2007/2008 <sup>11</sup> , Zambia 2007/2008 <sup>16</sup> |
| Northern Africa | Sudan 2008 <sup>14</sup> , Egypt 2006 <sup>a 13</sup> , Morocco 2003 <sup>a 12</sup>              |
| Western Africa  | Ghana 2007/2008 <sup>20</sup> , Nigeria 2006 <sup>21</sup>                                        |
| Southern Africa | South Africa 2010 <sup>17</sup> , Tanzania 2007/2008 <sup>19</sup>                                |

<sup>a</sup> had much greater fuel use relative to Sudan

While some information from other countries was available (Uganda, Madagascar, Sierra Leone, Rwanda, Senegal), it was not used to develop estimates of  $f_{light}$  because IEA does not report disaggregated fuel statistics for these countries.

Several surveys (e.g. Lighting Africa Market Reports, Ugandan Household Survey, Sudanese Census) provide detailed information on the primary type of lighting device used.<sup>15</sup> A population-weighted average for all reporting countries indicates that 62% of kerosene lighting devices used in houses are of the simple wick type, while the remainder is primarily hurricane wick lamps.



## ***S2.2 Kerosene Consumption in India***

Kerosene consumption for lighting was estimated for each state using survey results on state-level fractions of households using kerosene lighting and number of households (mean household size of 5 persons). Lamp usage assumptions, central estimates and uncertainty bounds, were 2 (1, 4) kerosene lamps per household, 4 (3, 5) hours of use per day,<sup>34</sup> and a burn rate guided by results from this study of 0.12 g/min (0.05, 0.20), and the same distributions discussed previously (S2.1). The prevalence of kerosene devices are not collected as part of National Sample Survey Organization (NSSO) surveys, however, several sources indicate that simple wicks are the dominant device used in households without access to electricity.<sup>35, 36</sup> As with all global estimates, these estimates do not consider the use of lighting for small-scale businesses (e.g. retail stalls, fishing).

In India, household kerosene use is typically limited to cooking and lighting (no heating). NSSO surveys also provide information on cooking fuels used in households. Based on household consumption surveys reported by NSSO, rural use of kerosene for lighting reduced from 103 to 72 households per thousand, between 2000 and 2005.<sup>31</sup> There was no reduction, however, in per capita rural kerosene use in the same period.<sup>32</sup> This implies that larger amounts of kerosene use for lighting and cooking may occur. Kerosene would replace electricity for lighting. Daily electricity outages (or load shedding), especially during the evening peak-load period, occur for 2.5-4 hrs and 11-12 hrs in urban and rural consumer segments, respectively.<sup>37</sup> Assuming a central frequency at which kerosene substitutes for electric lighting of 25% (rural) and 10% (urban), adds to the fraction of households using kerosene lighting. Kerosene use for daily household cooking was based on an average household requirement of 11 MJ of delivered energy.<sup>38</sup> This can be converted to an equivalent kerosene consumption rate using the energy density of kerosene (42.6 MJ/kg kerosene) and the average efficiency of the kerosene cooking stove.<sup>38</sup> The use of kerosene as a secondary cooking fuel is common, but secondary uses are not measured as part of NSSO or other assessments and therefore not included in the fraction of households reported as cooking with kerosene. Based on local correspondence and best approximations, we assume that kerosene replaces or substitutes wood use 25% and 10% of the time in urban and rural sectors, respectively.

### ***S2.3 Outdoor Escape Fraction ( $f_{outdoor}$ )***

Calculation of emissions ( $EM$  in Equation 1 of text) includes the fraction of the emissions that escapes outdoors ( $f_{outdoor}$ ). We found no estimates of indoor to outdoor escape fractions in the literature, but several studies have sought to characterize the penetration of outdoor particles to indoors. Emissions can be either deposited indoors, or they may be carried in indoor air transported to outdoors. During the latter journey, the emissions may deposit within the crack that leads to outdoors. However, Liu and Nazaroff<sup>39</sup> found a near-unity penetration rate for particles of sizes similar to those emitted from combustion; that is, crack deposition is negligible. We therefore ignore this loss source. Indoor deposition rates reported in outdoor-to-indoor modeling are  $0.12 \text{ h}^{-1}$  with uncertainty bounds of  $0.09$  to  $0.33 \text{ h}^{-1}$  for residential buildings.<sup>40</sup> Combined with estimates of air-change rates for buildings without insulation ( $1 \text{ h}^{-1}$  with uncertainty bounds of  $0.5$ - $3 \text{ h}^{-1}$ ), a mass balance gives an outdoor escape fraction of  $0.89$ . For modeling purposes we apply a triangular distribution bounded at  $0.78$ ,  $1$ .

### S3. Additional Results

#### S3.1 Real-Time Pollutant Concentrations

Real-time concentrations over one test are shown here to demonstrate the relative stability of kerosene lamp emissions during burning, in contrast with the highly fluctuating nature of cookstove emissions.

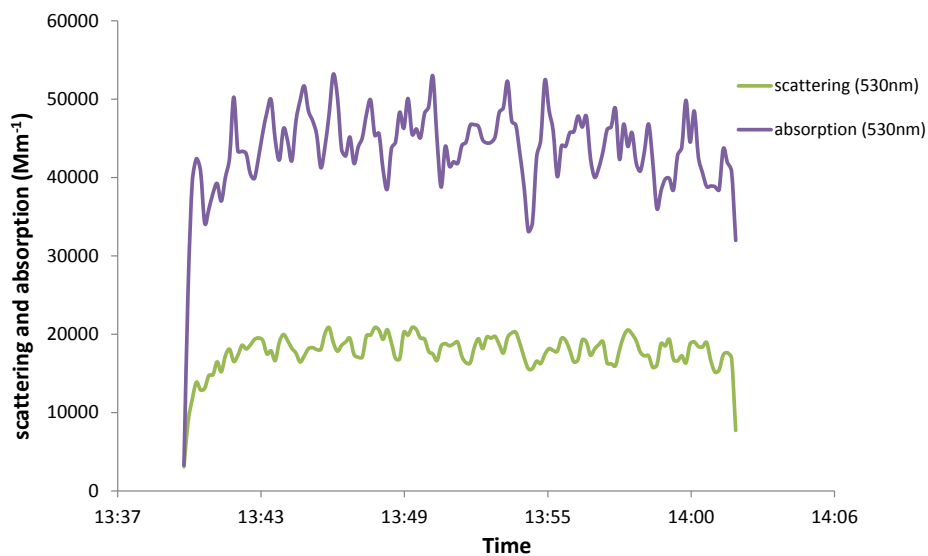

**Fig. S7a.** Real-time concentrations for particle optical properties over a single test (scattering and absorption). Data are averaged every ten seconds.

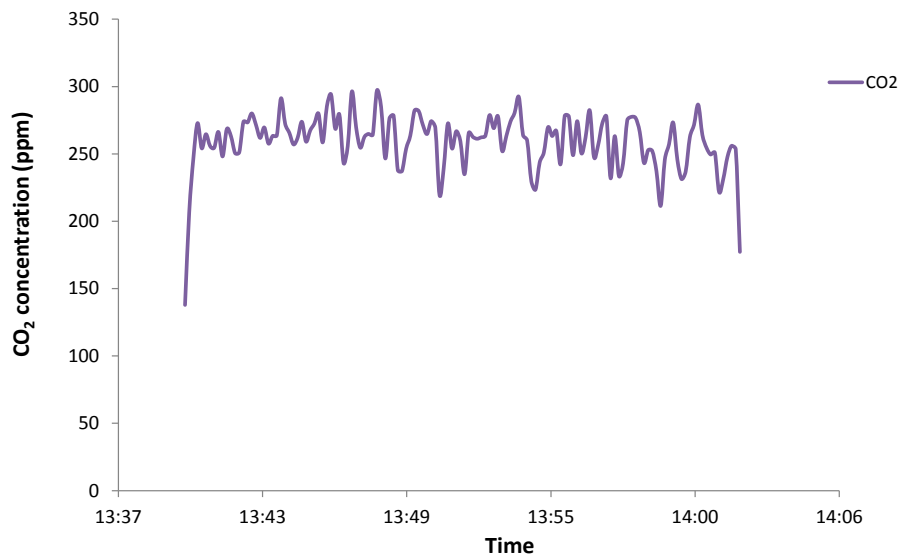

**Fig. S7b.** Real-time concentrations of CO<sub>2</sub> over a single test. Data are averaged every ten seconds.

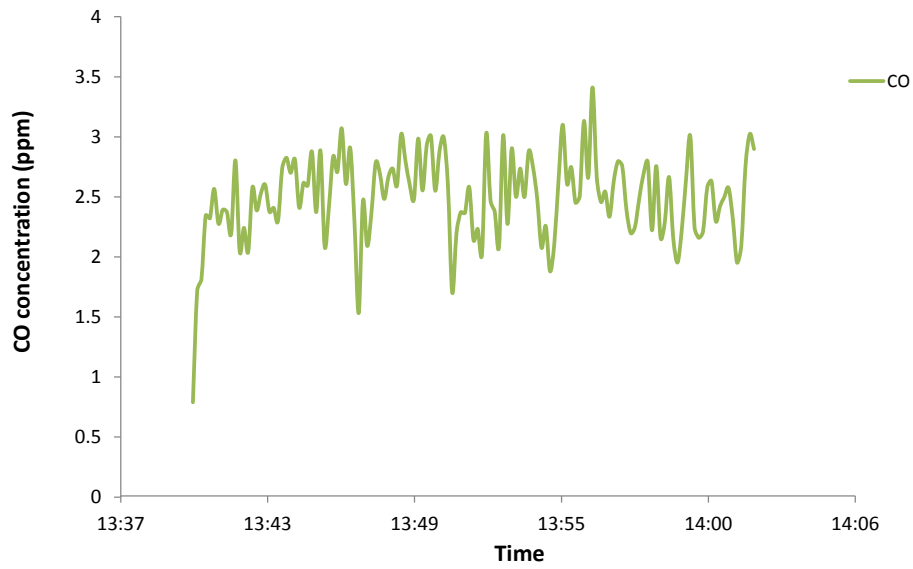

**Fig. S7c.** Real-time concentrations of CO over a single test. Data are averaged every ten seconds.

### S3.2 Emission Factors and Aerosol Characteristics

**Table S3.** Lab and field-based emission factors and burn rates for simple wick and hurricane lamps

|              |                    | Sample      |          | Emission Factors |                  |                                |               |                  | Burn Rate          |
|--------------|--------------------|-------------|----------|------------------|------------------|--------------------------------|---------------|------------------|--------------------|
|              |                    |             |          | <i>g/kg fuel</i> |                  |                                |               |                  | <i>g fuel/hour</i> |
|              |                    | Device ID   | n        | BC               | OC               | PM <sub>2.5</sub> <sup>†</sup> | CO            | CO <sub>2</sub>  |                    |
| <b>Lab</b>   | Low Wick           | <b>Avg.</b> | <b>9</b> | <b>76 (15)</b>   | <b>5 (4)</b>     | <b>81 (15)</b>                 | <b>16 (1)</b> | <b>2800 (60)</b> | <b>6 (2)**</b>     |
|              | <i>Simple Wick</i> | 1           | 3        | 66 (16)          | 6 (2)            | 71 (7)                         | 16 (1)        | 2820 (60)        | 5 (1)              |
|              |                    | 2           | 3        | 89 (8)           | 4 (0.1)          | 87 (18)                        | 18 (1)        | 2750 (30)        | 8 (0.6)            |
|              |                    | 3           | 3        | 72 (9)           | 4 (6)            | 85 (14)                        | 16 (1)        | 2810 (50)        | 5 (0.2)*           |
|              | High Wick          | 3           | 3        | 110 (4)          | 3 (3)            | 95 (12)                        | 21 (1)        | 2700 (5)         | 12 (0.4)           |
|              | Rope Wick          | 3           | 3        | 79 (6)           | 3 (4)            | 70 (8)                         | 16 (1)        | 2790 (10)        | 6 (0.3)            |
|              | Ugandan Kerosene   | 2           | 3        | 91 (2)           | 2 (1)            | 124 (7)                        | 16 (1)        | 2750 (8)         | 7 (0.2)            |
| <b>Field</b> | Typical            | <b>Avg.</b> | <b>7</b> | <b>90 (17)</b>   | <b>0.4 (0.8)</b> | <b>93 (23)</b>                 | <b>11(2)</b>  | <b>2770 (70)</b> | <b>7 (2)**</b>     |
|              | <i>Simple Wick</i> | 4           | 4        | 94 (19)          | 1 (1)            | 100 (19)                       | 12 (2)        | 2750 (73)        | 9 (3)*             |
|              |                    | 5           | 1        | 89 (-)           | < 1 (-)          | 4 (-)                          | 11 (-)        | 2770 (-)         | 6 (-)              |
|              |                    | 6           | 2        | 76 (-)           | 4 (-)            | 79 (-)                         | 8 (-)         | 2800 (-)         | 6 (-)              |
| <b>Lab</b>   | Med/High Wick      | 7           | 3        | 9 (1)            | 0.5 (0.3)        | 13 (3)                         | 3 (<1)        | 3080 (5)         | 26 (1)             |

Numbers in parentheses represent one standard deviation

*n* = measurement events, \* *n* = 2 (lab); *n* = 3 (field), \*\* *n* = 8 (lab); *n* = 6 (field)

Baseline settings are low wick (1-1.5mm), 1-K USA kerosene, and cotton cloth wick, unless specified otherwise

† Field results represent total suspended particles (TSP)

**Table S4.** Lab and field-based emission ratios and aerosol optical properties for simple wick and hurricane lamps

|                    |                  | Sample      |          | Ratios                             |                    |                        |                              | Optical Properties <sup>‡</sup> |                   |                    |
|--------------------|------------------|-------------|----------|------------------------------------|--------------------|------------------------|------------------------------|---------------------------------|-------------------|--------------------|
|                    |                  |             |          |                                    |                    |                        |                              | $m^2/g$                         | $m^2/g$           |                    |
|                    |                  | Device ID   | n        | BC/ PM <sub>2.5</sub> <sup>†</sup> | BC/TC              | OC/TC                  | OC/BC                        | MAC <sub>BC</sub>               | MSC <sub>PM</sub> | SSA                |
| <b>Lab</b>         | Low Wick         | <b>Avg.</b> | <b>9</b> | <b>0.95 (0.23)</b>                 | <b>0.95 (0.05)</b> | <b>0.06 (0.05)</b>     | <b>0.06 (0.05)</b>           | <b>7.0 (0.6)</b>                | <b>2.5 (0.5)</b>  | <b>0.27 (0.01)</b> |
| <i>Simple Wick</i> |                  | 1           | 3        | 0.94 (0.18)                        | 0.91 (0.01)        | 0.09 (0.03)            | 0.09 (0.02)                  | 7.0 (0.8)                       | 2.2 (0.4)         | 0.26 (0.01)        |
|                    |                  | 2           | 3        | 1.06 (0.31)                        | 0.96 (<0.01)       | 0.04 (0.01)            | 0.04 (<0.01)                 | 7.2 (0.7)                       | 2.9 (0.6)         | 0.28 (<0.01)       |
|                    |                  | 3           | 3        | 0.86 (0.08)                        | 0.96 (0.07)        | 0.04 (0.07)            | 0.05 (0.08)                  | 6.8 (0.2)                       | 2.2 (0.1)         | 0.28 (0.01)        |
|                    | High Wick        | 3           | 3        | 1.07 (0.15)                        | 0.97 (0.03)        | 0.03 (0.03)            | 0.03 (0.03)                  | 7.1 (0.1)                       | 3.1 (0.4)         | 0.29 (<0.01)       |
|                    | Rope Wick        | 3           | 3        | 1.15 (0.21)                        | 0.97 (0.04)        | 0.04 (0.05)            | 0.03 (0.05)                  | 7.0 (0.2)                       | 3.0 (0.5)         | 0.27 (<0.01)       |
|                    | Ugandan Kerosene | 2           | 3        | 0.73 (0.04)                        | 0.98 (0.01)        | 0.02 (0.01)            | 0.02 (0.01)                  | 7.1 (0.2)                       | 2.1 (0.1)         | 0.29 (<0.01)       |
| <b>Field</b>       | Typical          | <b>Avg.</b> | <b>7</b> | <b>1.02 (0.3)</b>                  | <b>1.0 (0.01)</b>  | <b>&lt;0.01 (0.01)</b> | <b>&lt; 0.01 (&lt; 0.01)</b> | <b>11.1 (1.6)</b>               | <b>1.9 (0.6)</b>  | <b>0.17 (0.01)</b> |
| <i>Simple Wick</i> |                  | 4           | 4        | 0.9 (0.1)                          | 1.0 (<0.01)        | <0.01 (<0.01)          | < 0.01 (<0.01)               | 10.7 (1.2)                      | 1.8 (0.4)         | 0.17 (-)           |
|                    |                  | 5           | 1        | 1.0 (-)                            | 0.98 (-)           | 0.02 (-)               | 0.02 (-)                     | 10.3 (-)                        | 1.8 (-)           | 0.16 (-)           |
|                    |                  | 6           | 2        | 1.4 (0)                            | 1.0 (-)            | <0.01 (-)              | < 0.01 (-)                   | 11.5 (-)                        | 3.1 (-)           | 0.17 (-)           |
| <b>Lab</b>         | Med/High Wick    | 7           | 3        | 0.66 (0.05)                        | 0.95 (0.03)        | 0.05 (0.03)            | 0.06 (0.04)                  | 6.5 (0.1)                       | 1.1 (0.1)         | 0.20 (0.00)        |
| <i>Hurricane</i>   |                  |             |          |                                    |                    |                        |                              |                                 |                   |                    |

Numbers in parentheses represent one standard deviation

Baseline settings are low wick (1-1.5mm), 1-K USA kerosene, and cotton cloth wick, unless specified otherwise

<sup>†</sup> Field results represent total suspended particles (TSP)

<sup>‡</sup> MAC – mass absorbance cross section (530 nm), MSC – mass scattering cross section, SSA – single scattering albedo

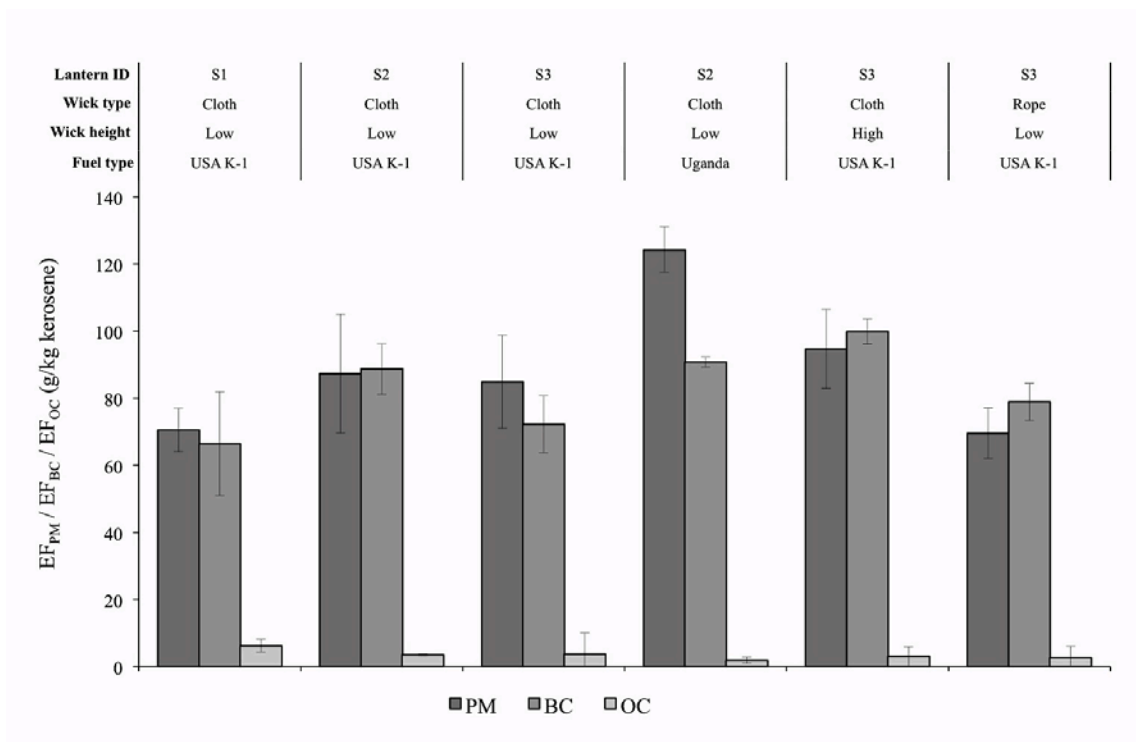

**Fig. S8a.** PM<sub>2.5</sub>, BC and OC emission factors from simple wick lamps tested under lab conditions. Errors bars represent  $\pm 1$  standard deviation of repeated tests.

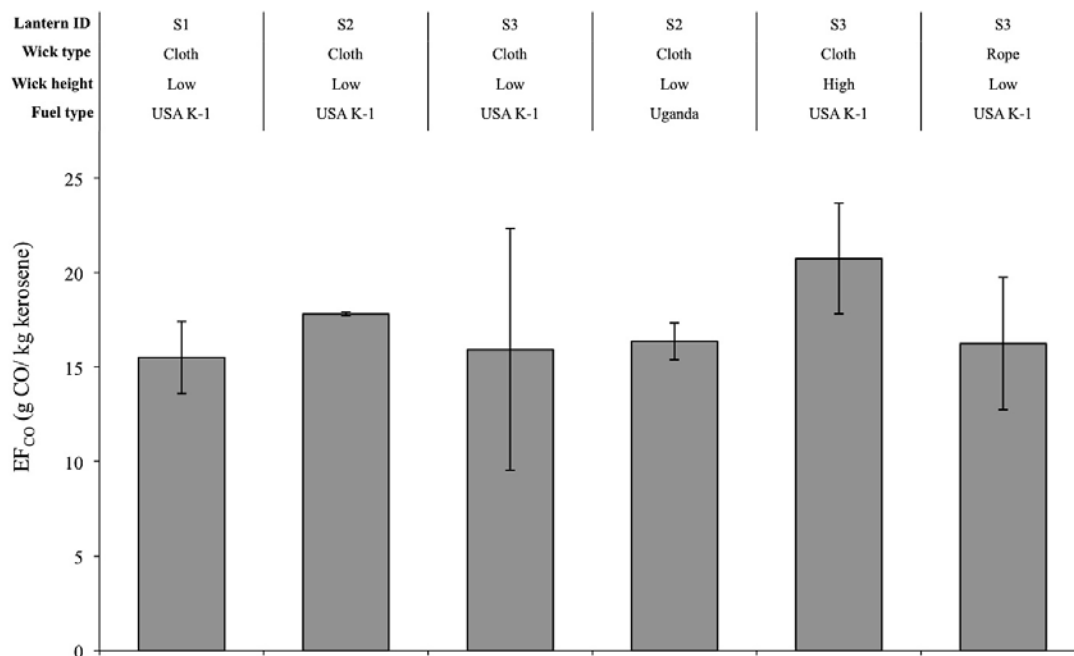

**Fig. S8b.** CO emission factors from simple wick lamps tested under lab conditions. Errors bars represent  $\pm 1$  standard deviation.

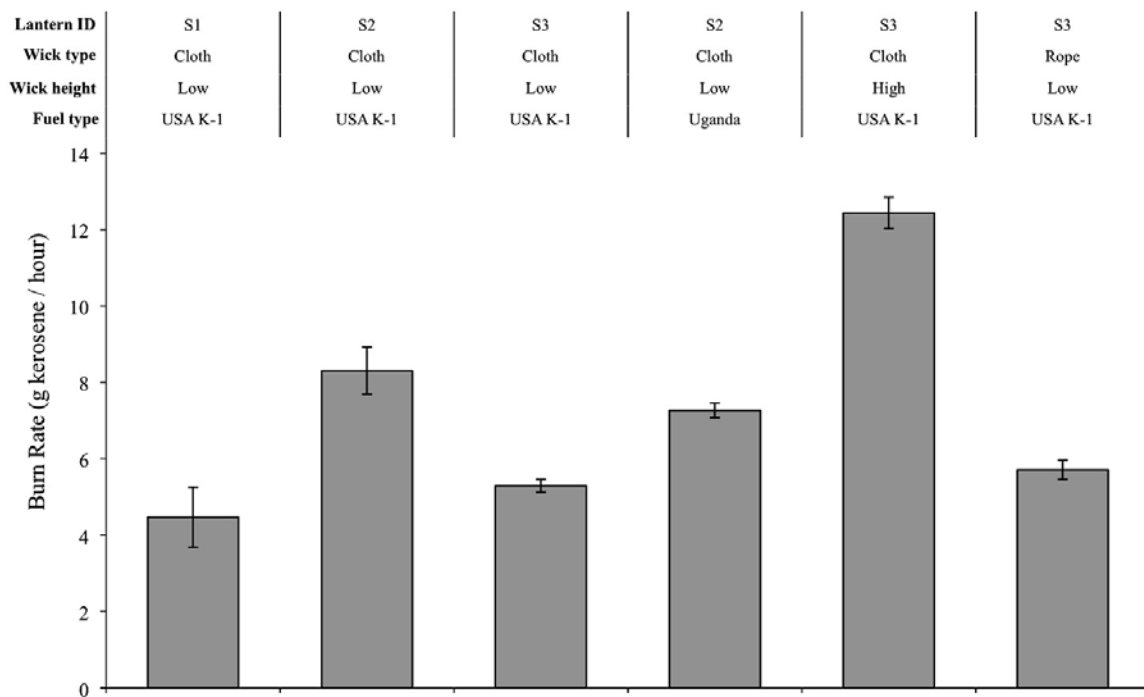

**Fig. S8c.** Burn rates from simple wick lamps tested under lab conditions. Error bars represent  $\pm 1$  standard deviation.



### S3.3 Impact Estimates

#### S3.3.1 Global BC emission

Table S5 presents assumptions and BC emission for 19 regions that were based on the 17 regions used in a common macroeconomic model (Integrated Model to Assess the Global Environmental or IMAGE, RIVM, 2001). The two additional regions, China and India, were separated from East Asia and South Asia, respectively. Country groupings in these regions may be slightly different than other common aggregations such as those used by the United Nations. The figure below shows the results of a 10,000-run Monte Carlo simulation. Uncertainties determined with the Monte Carlo simulation, which are used in the text, differ slightly from the simple combination of uncertainties shown in Table S5.

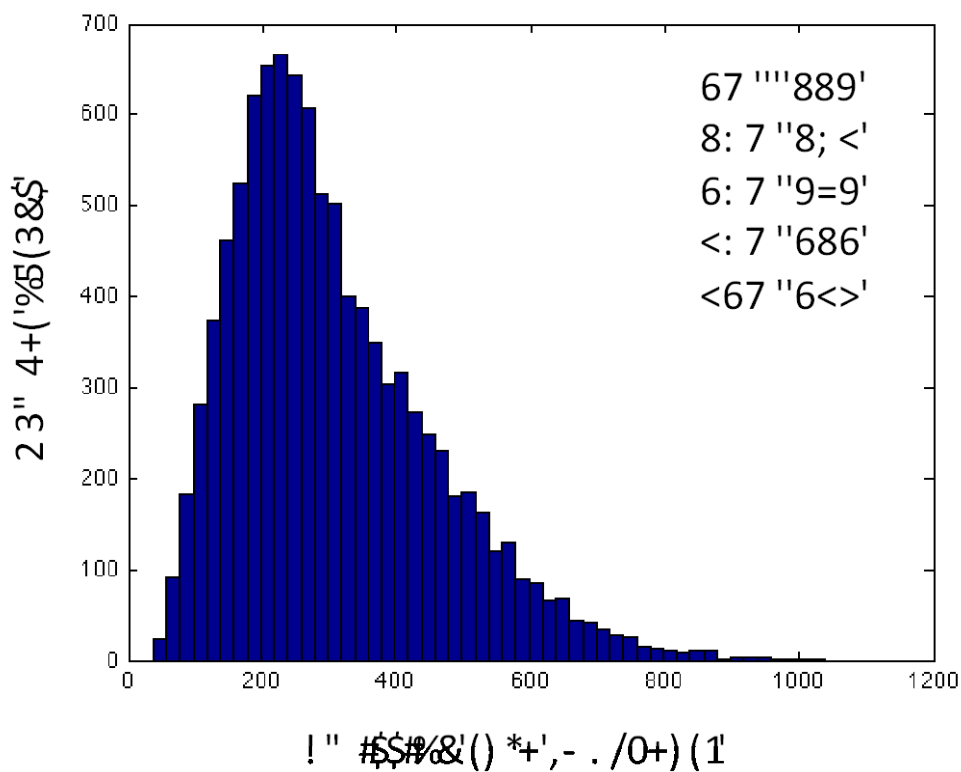

**Figure S9.** Frequency distribution and percentiles of the global BC emission rate based on a Monte Carlo simulation of 10,000 runs.

**Table S5.** Assumptions for 17 global regions. Values in parentheses for  $f_{light}$  and  $f_{device}$  are the bounds of a triangular distribution. Values in parentheses for emissions show lower and upper estimate bounds with a simple uncertainty combination; these are not the same as those obtained with the Monte Carlo analysis.

|                          | <b>Fraction of residential kerosene used for lighting (<math>f_{light}</math>)</b> | <b>Fraction of kerosene used by simple wick lamps (<math>f_{device}</math>)</b> | <b>Black carbon emissions<sup>a</sup> (<math>EM_{BC}</math>)</b> |
|--------------------------|------------------------------------------------------------------------------------|---------------------------------------------------------------------------------|------------------------------------------------------------------|
|                          |                                                                                    |                                                                                 | <b>Gg/year</b>                                                   |
| Canada                   | 0 (0, 0)                                                                           | 0 (0, 0)                                                                        | 0 (0, 0)                                                         |
| USA                      | 0 (0, 0)                                                                           | 0 (0, 0)                                                                        | 0 (0, 0)                                                         |
| Central America          | 0.277 (0.029, 0.866)                                                               | 0.5 (0, 0.7)                                                                    | 13 (0, 41)                                                       |
| South America            | 0.256 (0.023, 0.8)                                                                 | 0.5 (0, 0.7)                                                                    | 3 (0, 10)                                                        |
| Northern Africa          | 0.615 (0.099, 1)                                                                   | 0.6 (0.3, 0.9)                                                                  | 19 (0, 35)                                                       |
| Western Africa           | 0.245 (0.039, 1)                                                                   | 0.6 (0.3, 0.9)                                                                  | 32 (0, 132)                                                      |
| Eastern Africa           | 0.526 (0.084, 1)                                                                   | 0.6 (0.1, 0.9)                                                                  | 12 (0, 25)                                                       |
| Southern Africa          | 0.01 (0.001, 0.05)                                                                 | 0.6 (0.3, 0.9)                                                                  | 0 (0, 0)                                                         |
| OECD Europe              | 0 (0, 0)                                                                           | 0 (0, 0)                                                                        | 0 (0, 0)                                                         |
| Eastern Europe           | 0 (0, 0)                                                                           | 0 (0, 0)                                                                        | 0 (0, 0)                                                         |
| Former USSR              | 0 (0, 0)                                                                           | 0 (0, 0)                                                                        | 0 (0, 0)                                                         |
| Middle East              | 0.006 (0.001, 0.02)                                                                | 0.25 (0.1, 0.5)                                                                 | 1 (0, 4)                                                         |
| South Asia (excl. India) | 0.521 (0.054, 1)                                                                   | 0.8 (0.7, 0.95)                                                                 | 40 (3, 79)                                                       |
| India                    | 0.21 (0.05, 0.52)                                                                  | 0.8 (0.7, 0.95)                                                                 | 116 (23, 291)                                                    |
| East Asia (excl. China)  | 0 (0, 0)                                                                           | 0 (0, 0.4)                                                                      | 0 (0, 0)                                                         |
| China                    | 0.8 (0.5, 1)                                                                       | 0.8 (0.25, 0.95)                                                                | 13 (4, 18)                                                       |
| Southeast Asia           | 0.026 (0.003, 0.08)                                                                | 0.8 (0.5, 0.8)                                                                  | 14 (0, 43)                                                       |
| Oceania                  | 0 (0, 0)                                                                           | 1 (1, 1)                                                                        | 0 (0, 0)                                                         |
| Japan                    | 0 (0, 0)                                                                           | 0 (0, 0)                                                                        | 0 (0, 0)                                                         |
| <b>Total</b>             |                                                                                    |                                                                                 | <b>263 (30, 678)</b>                                             |

*a - Totals, especially uncertainty bounds, are different from those reported in the main text because this is a simple combination of uncertainties, while the text reports results of Monte Carlo simulations.*

### S3.3.2 Radiative Forcing

**Table S6a.** Specific Forcing Pulse (GJ/g) quantifying forcing in four latitude bands from 17 emitting regions, for direct forcing by black carbon in the atmosphere. Uncertainties ( $1-\sigma$ ) are in brackets.

| <b>Atmosphere</b> | <b>60N+</b>  | <b>30-60N</b> | <b>0-30N</b> | <b>S.Hemis.</b> |
|-------------------|--------------|---------------|--------------|-----------------|
| Canada            | 0.15 (0.062) | 0.62 (0.263)  | 0.04 (0.02)  | 0.002 (0.001)   |
| USA               | 0.09 (0.04)  | 0.6 (0.25)    | 0.14 (0.06)  | 0.01 (0)        |
| Central America   | 0.03 (0.01)  | 0.21 (0.09)   | 0.83 (0.37)  | 0.1 (0.04)      |
| South America     | 0.01 (0)     | 0.02 (0.01)   | 0.17 (0.07)  | 1.01 (0.45)     |
| Northern Africa   | 0.04 (0.02)  | 0.4 (0.22)    | 0.78 (0.44)  | 0.03 (0.01)     |
| Western Africa    | 0.01 (0.01)  | 0.05 (0.03)   | 0.88 (0.49)  | 0.28 (0.16)     |
| Eastern Africa    | 0.01 (0)     | 0.03 (0.02)   | 0.71 (0.4)   | 0.4 (0.22)      |
| Southern Africa   | 0 (0)        | 0.01 (0)      | 0.07 (0.04)  | 1.16 (0.65)     |
| OECD Europe       | 0.18 (0.08)  | 0.48 (0.2)    | 0.14 (0.06)  | 0.01 (0)        |
| Eastern Europe    | 0.18 (0.07)  | 0.55 (0.23)   | 0.14 (0.06)  | 0.01 (0)        |
| Former USSR       | 0.22 (0.09)  | 0.56 (0.24)   | 0.07 (0.03)  | 0 (0)           |
| Middle East       | 0.06 (0.03)  | 0.51 (0.28)   | 0.58 (0.33)  | 0.02 (0.01)     |
| South Asia        | 0.03 (0.02)  | 0.23 (0.13)   | 0.96 (0.54)  | 0.06 (0.03)     |
| East Asia         | 0.07 (0.03)  | 0.48 (0.2)    | 0.27 (0.11)  | 0.02 (0.01)     |
| Southeast Asia    | 0.02 (0.01)  | 0.08 (0.05)   | 0.56 (0.31)  | 0.3 (0.17)      |
| Oceania           | 0 (0)        | 0 (0)         | 0 (0)        | 0.98 (0.55)     |
| Japan             | 0.06 (0.04)  | 0.54 (0.3)    | 0.1 (0.06)   | 0.01 (0.01)     |

**Table S6b.** Specific Forcing Pulse (GJ/g) quantifying forcing in four latitude bands from 17 emitting regions, for forcing by black carbon deposited on snow. Uncertainties ( $1-\sigma$ ) are in brackets.

| <b>Cryosphere</b> | <b>60N+</b> | <b>30-60N</b> | <b>0-30N</b> | <b>S.Hemis.</b> |
|-------------------|-------------|---------------|--------------|-----------------|
| Canada            | 0.12 (0.11) | 0.25 (0.15)   | 0 (0)        | 0 (0)           |
| USA               | 0.06 (0.05) | 0.12 (0.07)   | 0 (0)        | 0 (0)           |
| Central America   | 0.01 (0.01) | 0.02 (0.01)   | 0 (0)        | 0 (0)           |
| South America     | 0 (0)       | 0 (0)         | 0 (0)        | 0.02 (0.01)     |
| Northern Africa   | 0.02 (0.01) | 0.06 (0.03)   | 0 (0)        | 0 (0)           |
| Western Africa    | 0 (0)       | 0.01 (0.01)   | 0 (0)        | 0 (0)           |
| Eastern Africa    | 0 (0)       | 0.01 (0.01)   | 0 (0)        | 0 (0)           |
| Southern Africa   | 0 (0)       | 0 (0)         | 0 (0)        | 0.01 (0.01)     |
| OECD Europe       | 0.12 (0.11) | 0.04 (0.03)   | 0 (0)        | 0 (0)           |
| Eastern Europe    | 0.12 (0.11) | 0.07 (0.04)   | 0 (0)        | 0 (0)           |
| Former USSR       | 0.22 (0.2)  | 0.27 (0.16)   | 0 (0)        | 0 (0)           |
| Middle East       | 0.04 (0.03) | 0.14 (0.08)   | 0 (0)        | 0 (0)           |
| South Asia        | 0.01 (0)    | 0.11 (0.06)   | 0.01 (0.01)  | 0 (0)           |
| East Asia         | 0.04 (0.05) | 0.1 (0.06)    | 0 (0)        | 0 (0)           |
| Southeast Asia    | 0 (0)       | 0.01 (0)      | 0 (0)        | 0 (0)           |
| Oceania           | 0 (0)       | 0 (0)         | 0 (0)        | 0.05 (0.03)     |
| Japan             | 0.04 (0.02) | 0.03 (0.02)   | 0 (0)        | 0 (0)           |

## Supporting References

- (1) Roden, C. A.; Bond, T. C.; Conway, S.; Pinel, A. B. O., Emission factors and real-time optical properties of particles emitted from traditional wood burning cookstoves. *Environ. Sci. Technol.* **2006**, *40*, (21), 6750-6757.
- (2) Bond, T. C.; Anderson, T. L.; Campbell, D., Calibration and intercomparison of filter-based measurements of visible light absorption by aerosols. *Aerosol Sci. Technol.* **1999**, *30*, (6), 582-600.
- (3) Anderson, T. L.; Ogren, J. A., Determining aerosol radiative properties using the TSI 3563 integrating nephelometer. *Aerosol Sci. Technol.* **1998**, *29*, (1), 57-69.
- (4) NIOSH *Diesel particulate matter (as Elemental Carbon)*. NIOSH Manual of Analytical Methods 5040, Issue 3; 2003.
- (5) Boparai, P.; Lee, J.; Bond, T. C., Revisiting Thermal-Optical Analyses of Carbonaceous Aerosol Using a Physical Model. *Aerosol Sci. Technol.* **2008**, *42*, (11), 930-948.
- (6) Smith, K. R.; Uma, R.; Kishore, V. V. N.; Lata, K.; Joshi, V.; Zhang, J.; Rasmussen, R. A.; Khalil, M. A. K. *Greenhouse gases from small-scale combustion devices in developing countries: Phase IIA, Household stoves in India*; US EPA: Washington DC, 2000; p 89.
- (7) Zhang, L.; Yang, Z.; Chen, B.; Chen, C., Rural energy in China: Pattern and policy. *Renew. Energ.* **2009**, *34*, 2813-2823.
- (8) International Energy Agency *Energy for all: Financing access for the poor* International Energy Agency: Oslo 2011.
- (9) Apple, J.; Vicente, R.; Yarberr, A.; Lohse, N.; Mills, E.; Jacobson, A.; Poppendieck, D., Characterization of particulate matter size distributions and indoor concentrations from kerosene and diesel lamps. *Indoor Air* **2010**, *20*, (5), 399-411.
- (10) IFC/WB *Quantitative Assessment - Ethiopia* International Finance Corporation and The World Bank: 2008a.
- (11) IFC/WB *Quantitative Assessment - Kenya*; International Finance Corporation and The World Bank: 2008c.
- (12) Demographic and Health Surveys, Demographic and Health Surveys (DHS). In U.S. Agency for International Development and ICF International: 2012.
- (13) Minnesota Population Center, *Integrated Public Use Microdata Series, International: Version 6.1 [Machine-readable dataset]*. University of Minnesota: Minneapolis, 2011.

- (14) Ismail, K.; Khlafala, M. *Sudanese 2008 Census Report: Household and Housing Characteristics*; Central Bureau of Statistics Sudan: Khartoum, 2009.
- (15) Uganda Bureau of Statistics *Uganda National Household Survey 2009/2010 - Abridged Report*; Uganda Bureau of Statistics Kampala, 2010.
- (16) IFC/WB *Quantitative Assessment - Zambia*; International Finance Corporation and The World Bank: 2008e.
- (17) Statistics South Africa *General household survey*; Statistics South Africa: Pretoria, 2011.
- (18) CSO Swaziland *Poverty in a decade of slow economic growth: Swaziland in the 2000's*; Central Statistical Office of Swaziland Mbabane, 2011.
- (19) IFC/WB *Quantitative Assessment - Tanzania*; International Finance Corporation and The World Bank: 2008d.
- (20) IFC/WB *Quantitative Assessment - Ghana*; International Finance Corporation and The World Bank: 2008b.
- (21) NBS Nigeria *General Household Survey 2006, Third Edition*; National Bureau of Statistics, Federal Government of Nigeria Abuja 2006.
- (22) Statistics Sierra Leone *Sierra Leone Integrated Household Survey (SLIHS) 2003/2004*; Statistics Sierra Leone and Department for International Development: 2007.
- (23) DIGESTYC *Censo de Población y Vivienda 2007 (Viviendas): Condición de ocupación* Dirección General de Estadística y Censos (DIGESTYC), República de El Salvador: San Salvador, 2007.
- (24) INE Honduras *Censo 2001: Datos del hogar*; Instituto Nacional de Estadística y Censos, Honduras: Tegucigalpa, 2001
- (25) INIDE Nicaragua *VIII Censo de Población y IV de Vivienda, 2005*; Instituto Nacional de Información de Desarrollo (INIDE): Managua 2005.
- (26) INE Panama *Censos de Población y Vivienda de Panamá: Año 2010 (Características de los hogares)*; Instituto Nacional de Estadística y Censo: Panama City, 2010.
- (27) ECLAC *Characteristics of households with ICTs in Latin America and the Caribbean* ECLAC / ICA-DRC /LIS: New York, 2007.
- (28) DANE *Censo 2005: Población, hogar y vivienda (Colombia)*; Departamento Administrativo Nacional de Estadística (DANE): Bogotá, 2005.

- (29) INEI Peru *Censo de Poblacion y Vividenda 2007*; El Instituto Nacional de Estadística e Informática Lima, 2007.
- (30) Asaduzzaman, M.; Barnes, D. F.; Khandker, S. R. *Restoring balance: Bangladesh's rural energy realities* The International Bank for Resconstruction and Development/The World Bank Group: Washington D.C., 2009.
- (31) NSSO *Energy sources of India household for cooking and lighting, NSS 61st Round (July 2004 - June 2005), Report No. 511 (61/1.0/4)*; National Sample Survey Organisation New Dehli, 2007.
- (32) NSSO *Household consumption of various goods and services in India, NSS 61st Round (July 2004 - June 2005), Report No. 509 (61/1.0/2)*; National Sample Survey Organisation: New Dehli, 2007.
- (33) Indonesia, B.-S. *Statistik Indonesia: Statistical yearbook of Indonesia 2011*; Badan Pusat Statistik: Jakarta, 2011.
- (34) Chaurey, A.; Kandpal, T. C., Carbon abatement potential of solar home systems in India and their cost reduction due to carbon finance. *Energ. Policy* **2009**, *37*, 115-125.
- (35) Palit, D.; Singh, J., Lighting a Billion Lives - Empowering the rural poor. *Boiling Point* **2011**, *59*, 42-45.
- (36) UNFCC CDM *Clean Development Mechanism Project Design Document Form: Rural Education for Development Society (REDS) CDM Photovoltaic Lighting Project (46071123)*; UNFCC Clean Development Mechanism: 2009.
- (37) More, C.; Saikia, S.; Banferjee, R., An analysis of Maharashtra's power situation *Economic and Political Weekly* **2007**, *42*, (39), 3943-3951.
- (38) Venkataraman, C.; Sagar, A. D.; Habib, G.; Lam, N.; Smith, K. R., Indian National Initiative for Advanced Bomass Cookstoves: The benefits of clean combustion. *Energy For Sustain Dev* **2011**, *14*, 63-72.
- (39) Liu, D. L.; Nazaroff, W. W., Modeling pollutant penetration across building envelopes. *Atmosph. Environ.* **2001**, *35*, 4451-4462.
- (40) Riley, W. J.; McKone, T. E.; Lai, A. C. K.; Nazaroff, W. W., Indoor particulate matter of outdoor origin: Importnce of size-dependent removal mechanisms. *Environ. Sci. Technol.* **2002**, *36*, (200-207).
